# Supplementary material for: Lactiplantibacillus plantarum ZDY2013 Inhibits the Development of Non-Alcoholic Fatty Liver Disease by Regulating the Intestinal Microbiota and Modulating the PI3K/Akt Pathway
Source: MDPI journal article supplement (doi:10.3390/nu16070958), 2024-03-27
Supplement: s1 [file s1]

**Supplementary Table S1** Primer sequences for quantitative real-time polymerase chain reaction.

| Gene                   |         | Sequence                |
|------------------------|---------|-------------------------|
| $\beta$ -actin         | Forward | GCTCCTCCTGAGCGCAAGTA    |
|                        | Reverse | CAGCTCAGTAACAGTCCGCC    |
| I $\kappa$ B- $\alpha$ | Forward | GAAGAGAAGCCGCTGACCAT    |
|                        | Reverse | CAGAAGTGCCTCAGCAATTCC   |
| NF- $\kappa$ B         | Forward | ACGATCTGTTTCCCCTCATC    |
|                        | Reverse | TGCTTCTCTCCCCAGGAATA    |
| IFN- $\gamma$          | Forward | TGATTGCGGGGTTGTATCTG    |
|                        | Reverse | CTGTCTGGCCTGCTGTAAAA    |
| TNF- $\alpha$          | Forward | CCCTCACACTCAGATCATCTTCT |
|                        | Reverse | GCTACGACGTGGGCTACAG     |
| IL-6                   | Forward | CTGCAAGAGACTTCCATCCAG   |
|                        | Reverse | AGTGGTATAGACAGGTCTGTTGG |
| TGF- $\beta$ 1         | Forward | GTCACTGGAGTTGTACGGCA    |
|                        | Reverse | TCATGTCATGGATGGTGCCC    |
| TLR4                   | Forward | AGCAAAGTCCCTGATGACATT   |
|                        | Reverse | CAGCCACCAGATTCTCTAAAC   |
| FAS                    | Forward | ATCCAACATATGGCTTCGC     |
|                        | Reverse | GCTGTTCGCAAATACGCT      |
| SREBP-1C               | Forward | GCGGAGCCATGGATTGCAC     |
|                        | Reverse | CTCTTCCTTGATACCAGGCCC   |
| ACC                    | Forward | CAATCCTCGGCACATGGAGA    |
|                        | Reverse | GCTCAGCCAAGCGGATGTAGA   |
| CPT-1 $\alpha$         | Forward | TGAGCGACTGGTGGGAGGAG    |
|                        | Reverse | GAGCCAGACCTTGAAGTAGCG   |
| C/EBP $\alpha$         | Forward | AGCAACGAGTACCGGGTACG    |
|                        | Reverse | TGTTTGGCTTTATCTCGGCTC   |
| PPAR- $\gamma$         | Forward | GATGCACTGCTATGAGCACTT   |
|                        | Reverse | AGAGGTCCACAGAGCTGATCC   |
| IRS-1                  | Forward | GTTGAGTTGGGCAGAATAGG    |
|                        | Reverse | CAGCAAGGAAGAGTGAGTAG    |
| InsR                   | Forward | CGCTCCTATGCTCTGGTAT     |
|                        | Reverse | GAGTGATGGTGAGGTTGTGT    |

| Gene      |         | Sequence                  |
|-----------|---------|---------------------------|
| PI3K      | Forward | GAAACAAAGCGGAGAACCTAT     |
|           | Reverse | CTTGACTTCGCCGTCTACCAC     |
| Akt       | Forward | ACAGTCATTGAGCGCACCT       |
|           | Reverse | CCTGATCGGAAGTCCATCGTCT    |
| mTOR      | Forward | TCGGTGCAAACCTACAGAAGC     |
|           | Reverse | TGCAGGTCGTATATGGACAGAG    |
| AMPK      | Forward | GTTGTAAACCCCTATTATTTGCGTG |
|           | Reverse | TGGAGTAGCAGTCCCTGATTTGG   |
| ZO-1      | Forward | GATCCCTGTAAGTCACCCAGA     |
|           | Reverse | CTCCCTGCTTGCACTCCTATC     |
| Occludin  | Forward | GGACTGTCAACTCTTTCCGC      |
|           | Reverse | CATTTATGATGAACAGCCCC      |
| Claudin-3 | Forward | CTGTCTGTCCTCTTCCAGCC      |
|           | Reverse | CCACTACCAGCAGTCGATGA      |
